Articles of interest in other COB journals

From *Journal of Cell Science*

**Protein phosphatase 2A negatively regulates aPKC signaling by modulating phosphorylation of Par-6 in *Drosophila* neuroblast asymmetric divisions**

Hironori Ogawa, Nao Ohta, Woongjoon Moon and Fumio Matsuzaki

Ogawa, H. et al. 2009. *J. Cell Sci.* doi:10.1242/jcs.050955

**VEGFR2-PLC $\gamma$ 1 axis is essential for endothelial specification of VEGFR2<sup>+</sup> vascular progenitor cells**

Hitoshi Sase, Tetsuro Watabe, Kyoko Kawasaki, Kohei Miyazono and Keiji Miyazawa

Sase, H. et al. 2009. *J. Cell Sci.* doi:10.1242/jcs.049908
